# Supplementary material
Source: publisher site journal article supplement (https://www.spandidos-publications.com/1330/downloadSupplementary)

Figure S1. Depmap analysis indicated that knockout of yrdC N6-threonylcarbamoyltransferase domain containing protein could significantly suppress the growth of several non-small cell lung carcinoma cell lines. Grey dots represent wild type cell lines and blue dots represent cell lines with mutated genes.

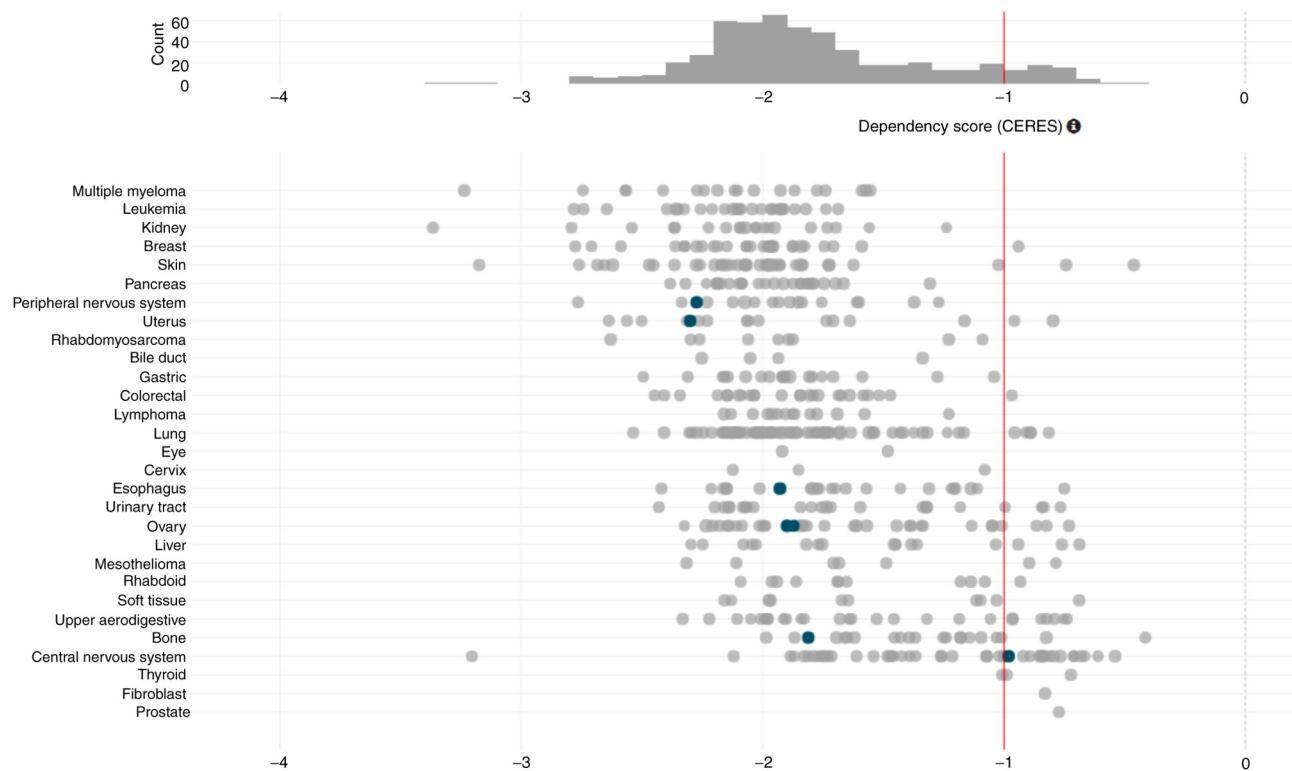

Supplement: Supplementary file 1 [file downloadSupplementary]
